# Supplementary material
Source: ML conference proceedings conference paper supplement (https://openreview.net/forum?id=hF8jnnexSB)
Supplement: supplementary_material [file attachment]

| Datasets    | Seq_Len | Pre_Len | Batch_Size | Learning_Rate | Kernel_Size | Individual | MSE   | MAE   |
|-------------|---------|---------|------------|---------------|-------------|------------|-------|-------|
| ETTh1       | 512     | 96      | 16         | 0.005         | 55          | 0          | 0.365 | 0.393 |
|             | 512     | 192     | 16         | 0.005         | 55          | 0          | 0.401 | 0.416 |
|             | 512     | 336     | 128        | 0.005         | 78          | 1          | 0.419 | 0.437 |
|             | 512     | 720     | 16         | 0.005         | 55          | 0          | 0.464 | 0.472 |
| ETTh2       | 512     | 96      | 128        | 0.005         | 55          | 0          | 0.269 | 0.339 |
|             | 512     | 192     | 128        | 0.005         | 78          | 0          | 0.329 | 0.383 |
|             | 512     | 336     | 128        | 0.0005        | 78          | 0          | 0.335 | 0.394 |
|             | 512     | 720     | 128        | 0.0001        | 78          | 0          | 0.379 | 0.424 |
| ETTm1       | 512     | 96      | 16         | 0.005         | 78          | 1          | 0.292 | 0.338 |
|             | 512     | 192     | 16         | 0.005         | 35          | 0          | 0.332 | 0.361 |
|             | 512     | 336     | 16         | 0.005         | 35          | 0          | 0.364 | 0.380 |
|             | 512     | 720     | 16         | 0.005         | 35          | 0          | 0.418 | 0.411 |
| ETTm2       | 512     | 96      | 16         | 0.005         | 24          | 1          | 0.161 | 0.249 |
|             | 512     | 192     | 16         | 0.005         | 55          | 1          | 0.216 | 0.288 |
|             | 512     | 336     | 16         | 0.005         | 35          | 0          | 0.271 | 0.327 |
|             | 512     | 720     | 64         | 0.005         | 24          | 0          | 0.361 | 0.387 |
| Weather     | 512     | 96      | 16         | 0.005         | 55          | 0          | 0.140 | 0.188 |
|             | 512     | 192     | 16         | 0.005         | 78          | 1          | 0.183 | 0.230 |
|             | 512     | 336     | 16         | 0.005         | 24          | 1          | 0.234 | 0.271 |
|             | 512     | 720     | 128        | 0.005         | 78          | 0          | 0.306 | 0.325 |
| Electricity | 512     | 96      | 16         | 0.005         | 55          | 0          | 0.132 | 0.227 |
|             | 512     | 192     | 128        | 0.005         | 55          | 1          | 0.145 | 0.241 |
|             | 512     | 336     | 64         | 0.005         | 55          | 0          | 0.161 | 0.257 |
|             | 512     | 720     | 16         | 0.005         | 55          | 0          | 0.201 | 0.289 |
| Traffic     | 512     | 96      | 16         | 0.005         | 35          | 0          | 0.396 | 0.275 |
|             | 512     | 192     | 16         | 0.005         | 35          | 0          | 0.407 | 0.279 |
|             | 512     | 336     | 16         | 0.005         | 24          | 0          | 0.417 | 0.285 |
|             | 512     | 720     | 16         | 0.005         | 24          | 0          | 0.453 | 0.304 |

Table 1: The hyperparameters of Conv modele with look-back window size 512. Note that the default train epoch is set to 100.

| Methods     |     | Conv*        |              | Dconv*       |              | PatchTST*    |              | TimesNet* |       | SCINet* |       | MICN-regre* |       | N-Hits |       |
|-------------|-----|--------------|--------------|--------------|--------------|--------------|--------------|-----------|-------|---------|-------|-------------|-------|--------|-------|
| Metric      |     | MSE          | MAE          | MSE          | MAE          | MSE          | MAE          | MSE       | MAE   | MSE     | MAE   | MSE         | MAE   | MSE    | MAE   |
| Weather     | 96  | 0.140        | 0.188        | 0.166        | 0.220        | 0.149        | 0.198        | 0.159     | 0.215 | -       | -     | 0.161       | 0.229 | 0.092  | 0.020 |
|             | 192 | 0.182        | 0.230        | 0.209        | 0.259        | 0.194        | 0.241        | 0.219     | 0.261 | -       | -     | 0.220       | 0.281 | 0.208  | 0.322 |
|             | 336 | 0.237        | 0.271        | 0.253        | 0.293        | 0.245        | 0.282        | 0.274     | 0.306 | -       | -     | 0.257       | 0.316 | 0.301  | 0.403 |
|             | 720 | 0.294        | 0.324        | 0.306        | 0.335        | 0.306        | 0.334        | 0.347     | 0.356 | -       | -     | 0.311       | 0.356 | 0.798  | 0.596 |
|             | Avg | <b>0.213</b> | <b>0.253</b> | 0.234        | 0.277        | 0.224        | 0.264        | 0.250     | 0.285 | -       | -     | 0.237       | 0.296 | 0.350  | 0.335 |
| Electricity | 96  | 0.129        | 0.225        | 0.130        | 0.225        | 0.129        | 0.222        | 0.168     | 0.272 | 0.140   | 0.236 | 0.155       | 0.265 | -      | -     |
|             | 192 | 0.143        | 0.238        | 0.144        | 0.238        | 0.147        | 0.240        | 0.184     | 0.289 | 0.156   | 0.252 | 0.177       | 0.285 | -      | -     |
|             | 336 | 0.159        | 0.255        | 0.160        | 0.256        | 0.163        | 0.259        | 0.196     | 0.299 | 0.172   | 0.268 | 0.180       | 0.292 | -      | -     |
|             | 720 | 0.195        | 0.286        | 0.199        | 0.288        | 0.197        | 0.290        | 0.220     | 0.320 | 0.140   | 0.236 | 0.207       | 0.316 | -      | -     |
|             | Avg | <b>0.157</b> | <b>0.251</b> | 0.158        | 0.252        | 0.159        | 0.252        | 0.192     | 0.295 | 0.152   | 0.248 | 0.180       | 0.290 | -      | -     |
| ETTm2       | 96  | 0.161        | 0.249        | 0.161        | 0.253        | 0.166        | 0.256        | 0.187     | 0.267 | 0.203   | 0.303 | 0.176       | 0.275 | 0.176  | 0.255 |
|             | 192 | 0.217        | 0.287        | 0.213        | 0.292        | 0.221        | 0.297        | 0.249     | 0.309 | 0.374   | 0.428 | 0.254       | 0.334 | 0.245  | 0.305 |
|             | 336 | 0.257        | 0.329        | 0.258        | 0.325        | 0.274        | 0.329        | 0.295     | 0.349 | 0.414   | 0.454 | 0.288       | 0.351 | 0.295  | 0.346 |
|             | 720 | 0.325        | 0.379        | 0.325        | 0.369        | 0.344        | 0.379        | 0.408     | 0.403 | 0.585   | 0.537 | 0.417       | 0.440 | 0.401  | 0.413 |
|             | Avg | 0.240        | 0.311        | <b>0.239</b> | <b>0.310</b> | 0.251        | 0.315        | 0.285     | 0.332 | 0.394   | 0.431 | 0.284       | 0.350 | 0.279  | 0.330 |
| ETTm1       | 96  | 0.287        | 0.334        | 0.300        | 0.342        | 0.293        | 0.346        | 0.335     | 0.376 | 0.329   | 0.376 | 0.311       | 0.364 | 0.302  | 0.350 |
|             | 192 | 0.328        | 0.358        | 0.335        | 0.363        | 0.333        | 0.370        | 0.374     | 0.387 | 0.388   | 0.417 | 0.356       | 0.388 | 0.347  | 0.383 |
|             | 336 | 0.356        | 0.384        | 0.356        | 0.384        | 0.369        | 0.392        | 0.410     | 0.411 | 0.408   | 0.430 | 0.407       | 0.422 | 0.369  | 0.402 |
|             | 720 | 0.394        | 0.408        | 0.393        | 0.405        | 0.407        | 0.421        | 0.478     | 0.450 | 0.463   | 0.457 | 0.464       | 0.462 | 0.431  | 0.441 |
|             | Avg | <b>0.341</b> | <b>0.371</b> | 0.346        | 0.374        | 0.351        | 0.382        | 0.399     | 0.406 | 0.397   | 0.420 | 0.408       | 0.425 | 0.362  | 0.394 |
| ETTh1       | 96  | 0.365        | 0.393        | 0.366        | 0.382        | 0.370        | 0.400        | 0.384     | 0.402 | 0.400   | 0.426 | 0.389       | 0.424 | 0.378  | 0.393 |
|             | 192 | 0.403        | 0.418        | 0.400        | 0.412        | 0.413        | 0.429        | 0.436     | 0.429 | 0.476   | 0.478 | 0.474       | 0.487 | 0.427  | 0.436 |
|             | 336 | 0.424        | 0.428        | 0.421        | 0.422        | 0.422        | 0.440        | 0.491     | 0.469 | 0.504   | 0.495 | 0.516       | 0.524 | 0.458  | 0.484 |
|             | 720 | 0.450        | 0.460        | 0.429        | 0.446        | 0.447        | 0.468        | 0.521     | 0.500 | 0.544   | 0.527 | 0.743       | 0.664 | 0.561  | 0.501 |
|             | Avg | 0.411        | 0.425        | <b>0.404</b> | <b>0.416</b> | 0.413        | 0.434        | 0.458     | 0.450 | 0.481   | 0.482 | 0.531       | 0.525 | 0.456  | 0.454 |
| ETTh2       | 96  | 0.268        | 0.339        | 0.269        | 0.334        | 0.274        | 0.337        | 0.340     | 0.374 | 0.289   | 0.355 | 0.299       | 0.364 | 0.274  | 0.345 |
|             | 192 | 0.327        | 0.382        | 0.326        | 0.375        | 0.341        | 0.382        | 0.402     | 0.414 | 0.348   | 0.387 | 0.441       | 0.454 | 0.353  | 0.401 |
|             | 336 | 0.329        | 0.390        | 0.321        | 0.386        | 0.329        | 0.384        | 0.390     | 0.437 | 0.365   | 0.409 | 0.654       | 0.567 | 0.382  | 0.425 |
|             | 720 | 0.380        | 0.424        | 0.382        | 0.428        | 0.379        | 0.422        | 0.462     | 0.468 | 0.475   | 0.488 | 0.956       | 0.716 | 0.625  | 0.557 |
|             | Avg | 0.326        | 0.384        | <b>0.325</b> | <b>0.381</b> | 0.330        | <b>0.381</b> | 0.399     | 0.423 | 0.369   | 0.409 | 0.588       | 0.525 | 0.409  | 0.432 |
| Traffic     | 96  | 0.383        | 0.271        | 0.378        | 0.264        | 0.360        | 0.249        | 0.593     | 0.321 | 0.425   | 0.316 | 0.473       | 0.306 | 0.402  | 0.282 |
|             | 192 | 0.397        | 0.275        | 0.390        | 0.269        | 0.379        | 0.256        | 0.615     | 0.331 | 0.470   | 0.326 | 0.475       | 0.298 | 0.420  | 0.297 |
|             | 336 | 0.411        | 0.282        | 0.404        | 0.275        | 0.392        | 0.264        | 0.629     | 0.336 | 0.540   | 0.359 | 0.493       | 0.307 | 0.448  | 0.313 |
|             | 720 | 0.450        | 0.302        | 0.442        | 0.294        | 0.432        | 0.286        | 0.640     | 0.350 | 0.620   | 0.394 | 0.531       | 0.325 | 0.539  | 0.353 |
|             | Avg | 0.410        | 0.283        | 0.404        | 0.276        | <b>0.390</b> | <b>0.263</b> | 0.619     | 0.335 | 0.514   | 0.346 | 0.493       | 0.309 | 0.452  | 0.311 |

Table 2: Multivariate prediction results within a broader window size range on seven benchmarks.

| Methods       |     | Conv         |              | DConv        |              | PatchTST     |              | Conv         |              | DConv        |              | PatchTST |              |
|---------------|-----|--------------|--------------|--------------|--------------|--------------|--------------|--------------|--------------|--------------|--------------|----------|--------------|
|               |     | (Ours)       |              | (Ours)       |              | 2023         |              | (Ours)       |              | (Ours)       |              | 2023     |              |
| Series Length |     | 720          |              |              |              |              |              | 1600         |              |              |              |          |              |
| Metric        |     | MSE          | MAE          | MSE      | MAE          |
| Weather       | 96  | 0.141        | 0.189        | 0.167        | 0.220        | 0.156        | 0.208        | 0.141        | 0.196        | 0.166        | 0.222        | 0.159    | 0.214        |
|               | 192 | 0.183        | 0.231        | 0.212        | 0.259        | 0.197        | 0.245        | 0.183        | 0.239        | 0.209        | 0.260        | 0.202    | 0.253        |
|               | 336 | 0.233        | 0.272        | 0.257        | 0.294        | 0.247        | 0.284        | 0.232        | 0.277        | 0.253        | 0.293        | 0.309    | 0.350        |
|               | 720 | 0.303        | 0.324        | 0.318        | 0.339        | 0.311        | 0.333        | 0.296        | 0.324        | 0.307        | 0.334        | 0.306    | 0.334        |
|               | Avg | <b>0.215</b> | <b>0.254</b> | 0.239        | 0.278        | 0.228        | 0.268        | <b>0.213</b> | <b>0.259</b> | 0.234        | 0.277        | 0.244    | 0.288        |
| Electricity   | 96  | 0.131        | 0.225        | 0.133        | 0.228        | 0.133        | 0.229        | 0.129        | 0.225        | 0.130        | 0.226        | 0.140    | 0.245        |
|               | 192 | 0.146        | 0.239        | 0.145        | 0.242        | 0.149        | 0.245        | 0.144        | 0.239        | 0.145        | 0.239        | 0.156    | 0.258        |
|               | 336 | 0.161        | 0.257        | 0.162        | 0.258        | 0.168        | 0.266        | 0.159        | 0.255        | 0.161        | 0.256        | 0.173    | 0.277        |
|               | 720 | 0.200        | 0.288        | 0.202        | 0.291        | 0.206        | 0.298        | 0.195        | 0.286        | 0.199        | 0.288        | 0.212    | 0.308        |
|               | Avg | <b>0.160</b> | <b>0.252</b> | 0.161        | 0.255        | 0.164        | 0.260        | <b>0.157</b> | <b>0.251</b> | 0.159        | 0.252        | 0.170    | 0.272        |
| ETTm2         | 96  | 0.161        | 0.251        | 0.162        | 0.252        | 0.166        | 0.259        | 0.161        | 0.257        | 0.161        | 0.255        | 0.170    | 0.265        |
|               | 192 | 0.218        | 0.291        | 0.216        | 0.290        | 0.221        | 0.297        | 0.213        | 0.296        | 0.214        | 0.292        | 0.226    | 0.305        |
|               | 336 | 0.272        | 0.329        | 0.268        | 0.326        | 0.272        | 0.331        | 0.258        | 0.329        | 0.259        | 0.325        | 0.279    | 0.341        |
|               | 720 | 0.351        | 0.387        | 0.347        | 0.378        | 0.350        | 0.380        | 0.325        | 0.378        | 0.325        | 0.369        | 0.344    | 0.379        |
|               | Avg | 0.251        | 0.315        | <b>0.248</b> | <b>0.312</b> | 0.252        | 0.317        | <b>0.239</b> | 0.315        | 0.240        | <b>0.310</b> | 0.255    | 0.323        |
| ETTm1         | 96  | 0.294        | 0.341        | 0.306        | 0.349        | 0.299        | 0.352        | 0.298        | 0.348        | 0.307        | 0.354        | 0.314    | 0.367        |
|               | 192 | 0.333        | 0.362        | 0.336        | 0.366        | 0.340        | 0.377        | 0.332        | 0.368        | 0.334        | 0.370        | 0.341    | 0.382        |
|               | 336 | 0.363        | 0.382        | 0.365        | 0.384        | 0.376        | 0.398        | 0.356        | 0.384        | 0.356        | 0.384        | 0.369    | 0.399        |
|               | 720 | 0.413        | 0.410        | 0.414        | 0.411        | 0.417        | 0.422        | 0.394        | 0.409        | 0.394        | 0.406        | 0.407    | 0.421        |
|               | Avg | <b>0.351</b> | <b>0.374</b> | 0.355        | 0.378        | 0.358        | 0.387        | <b>0.345</b> | <b>0.377</b> | 0.348        | 0.379        | 0.358    | 0.392        |
| ETTth1        | 96  | 0.377        | 0.404        | 0.375        | 0.398        | 0.379        | 0.411        | 0.391        | 0.416        | 0.387        | 0.410        | 0.380    | 0.413        |
|               | 192 | 0.417        | 0.428        | 0.413        | 0.421        | 0.416        | 0.433        | 0.425        | 0.437        | 0.422        | 0.432        | 0.469    | 0.478        |
|               | 336 | 0.433        | 0.450        | 0.438        | 0.438        | 0.425        | 0.440        | 0.448        | 0.465        | 0.442        | 0.447        | 0.461    | 0.478        |
|               | 720 | 0.481        | 0.485        | 0.453        | 0.466        | 0.448        | 0.469        | 0.464        | 0.477        | 0.456        | 0.470        | 0.495    | 0.497        |
|               | Avg | 0.427        | 0.442        | 0.420        | <b>0.431</b> | <b>0.417</b> | 0.438        | 0.432        | 0.449        | <b>0.427</b> | <b>0.440</b> | 0.451    | 0.467        |
| ETTth2        | 96  | 0.276        | 0.344        | 0.270        | 0.336        | 0.277        | 0.340        | 0.276        | 0.347        | 0.274        | 0.344        | 0.279    | 0.347        |
|               | 192 | 0.336        | 0.389        | 0.331        | 0.376        | 0.341        | 0.382        | 0.332        | 0.396        | 0.333        | 0.386        | 0.340    | 0.390        |
|               | 336 | 0.340        | 0.398        | 0.325        | 0.387        | 0.331        | 0.387        | 0.347        | 0.410        | 0.338        | 0.403        | 0.342    | 0.406        |
|               | 720 | 0.381        | 0.427        | 0.385        | 0.437        | 0.385        | 0.427        | 0.395        | 0.436        | 0.404        | 0.454        | 0.401    | 0.445        |
|               | Avg | 0.333        | 0.390        | <b>0.328</b> | <b>0.384</b> | 0.334        | <b>0.384</b> | 0.338        | <b>0.397</b> | <b>0.337</b> | <b>0.397</b> | 0.341    | <b>0.397</b> |
| Traffic       | 96  | 0.387        | 0.271        | 0.385        | 0.267        | 0.398        | 0.297        | 0.384        | 0.271        | 0.379        | 0.264        | OOM      |              |
|               | 192 | 0.399        | 0.276        | 0.389        | 0.271        | 0.411        | 0.302        | 0.397        | 0.276        | 0.390        | 0.272        |          |              |
|               | 336 | 0.412        | 0.282        | 0.404        | 0.280        | 0.425        | 0.309        | 0.411        | 0.283        | 0.403        | 0.275        |          |              |
|               | 720 | 0.452        | 0.304        | 0.448        | 0.299        | 0.460        | 0.324        | 0.451        | 0.302        | 0.442        | 0.295        |          |              |
|               | Avg | 0.413        | 0.283        | <b>0.407</b> | <b>0.279</b> | 0.424        | 0.308        | 0.411        | 0.283        | <b>0.404</b> | <b>0.277</b> | -        | -            |

Table 3: The comparisons of PatchTST and LTSF-Conv models with look-back window size of {720, 1600} on seven datasets.

| Methods | Conv         |              | PatchTST |       | DLinear |       |
|---------|--------------|--------------|----------|-------|---------|-------|
| Metric  | MSE          | MAE          | MSE      | MAE   | MSE     | MAE   |
| 24      | 0.451        | 0.552        | 0.637    | 0.552 | 0.725   | 0.681 |
| 36      | 0.508        | 0.574        | 0.765    | 0.634 | 0.792   | 0.744 |
| 48      | 0.597        | 0.636        | 0.756    | 0.692 | 0.886   | 0.815 |
| 60      | 0.675        | 0.680        | 0.776    | 0.741 | 0.960   | 0.859 |
| Avg     | <b>0.558</b> | <b>0.611</b> | 0.734    | 0.655 | 0.841   | 0.775 |

Table 4: The forecasting results on the ILI benchmark under the setting, where  $L = 104$ .

| Benchmarks |     | Weather |       |       |       |              | ETTh1 |       |       |       |              |
|------------|-----|---------|-------|-------|-------|--------------|-------|-------|-------|-------|--------------|
| Models     |     | 96      | 192   | 336   | 720   | Avg          | 96    | 192   | 336   | 720   | Avg          |
| RLinear_CD | MSE | 0.175   | 0.217 | 0.265 | 0.328 | 0.246        | 0.301 | 0.34  | 0.373 | 0.43  | 0.361        |
|            | MAE | 0.225   | 0.259 | 0.293 | 0.339 | 0.279        | 0.342 | 0.366 | 0.385 | 0.417 | 0.377        |
| RLinear_CI | MSE | 0.146   | 0.189 | 0.241 | 0.313 | <b>0.222</b> | 0.289 | 0.332 | 0.368 | 0.426 | <b>0.353</b> |
|            | MAE | 0.194   | 0.234 | 0.274 | 0.327 | <b>0.257</b> | 0.335 | 0.361 | 0.38  | 0.413 | <b>0.372</b> |
| DLinear_CD | MSE | 0.175   | 0.219 | 0.265 | 0.323 | 0.245        | 0.299 | 0.335 | 0.369 | 0.424 | 0.356        |
|            | MAE | 0.237   | 0.282 | 0.318 | 0.361 | 0.299        | 0.343 | 0.365 | 0.386 | 0.42  | 0.378        |
| DLinear_CI | MSE | 0.146   | 0.19  | 0.243 | 0.317 | <b>0.224</b> | 0.285 | 0.327 | 0.367 | 0.428 | <b>0.351</b> |
|            | MAE | 0.212   | 0.257 | 0.301 | 0.358 | <b>0.282</b> | 0.334 | 0.358 | 0.383 | 0.417 | <b>0.373</b> |
| NLinear_CD | MSE | 0.181   | 0.225 | 0.27  | 0.339 | 0.253        | 0.305 | 0.348 | 0.375 | 0.433 | 0.365        |
|            | MAE | 0.232   | 0.268 | 0.3   | 0.348 | 0.287        | 0.347 | 0.375 | 0.388 | 0.421 | 0.382        |
| NLinear_CI | MSE | 0.146   | 0.189 | 0.242 | 0.321 | <b>0.224</b> | 0.293 | 0.337 | 0.379 | 0.435 | <b>0.361</b> |
|            | MAE | 0.196   | 0.238 | 0.28  | 0.335 | <b>0.262</b> | 0.341 | 0.367 | 0.39  | 0.422 | <b>0.38</b>  |

Table 5: Multivariate prediction results on two benchmarks. CI denotes channel-independence, and CD represents channel-dependence.
